# Supplementary material for: Who Uses Physician-Rating Websites? Differences in Sociodemographic Variables, Psychographic Variables, and Health Status of Users and Nonusers of Physician-Rating Websites
Source: J Med Internet Res. 2014 Mar 31;16(3):e97. doi: 10.2196/jmir.3145 (PMC4004145; doi:10.2196/jmir.3145)
Supplement: Supplementary file 1 [file jmir_v16i3e97_app1.pdf]

Average Internet usage in hours per month

5. Welche Bedeutung haben für Sie die einzelnen Quellen, wenn Sie gesundheitsorientierte Informationen benötigen?

|      |                             | Überhaupt keine Bedeutung |   |   |   |   |   | Sehr hohe Bedeutung | Keine Antwort |
|------|-----------------------------|---------------------------|---|---|---|---|---|---------------------|---------------|
| F6_1 | Familie                     | 1                         | 2 | 3 | 4 | 5 | 6 | 7                   | 8             |
| F6_2 | Freunde                     | 1                         | 2 | 3 | 4 | 5 | 6 | 7                   | 8             |
| F6_3 | Arzt/Ärztin                 | 1                         | 2 | 3 | 4 | 5 | 6 | 7                   | 8             |
| F6_4 | Apotheker/in                | 1                         | 2 | 3 | 4 | 5 | 6 | 7                   | 8             |
| F6_5 | Versicherungsberater/in     | 1                         | 2 | 3 | 4 | 5 | 6 | 7                   | 8             |
| F6_6 | Internet                    | 1                         | 2 | 3 | 4 | 5 | 6 | 7                   | 8             |
| F6_7 | Bücher/Medizinzeitschriften | 1                         | 2 | 3 | 4 | 5 | 6 | 7                   | 8             |
| F6_8 | Andere Quellen              | 1                         | 2 | 3 | 4 | 5 | 6 | 7                   | 8             |

How important are the following sources for you, if you need health related information?

|      |                 | Not important at all |   |   |   |   |   | Very important | No answer |
|------|-----------------|----------------------|---|---|---|---|---|----------------|-----------|
| F6_1 | Family          | 1                    | 2 | 3 | 4 | 5 | 6 | 7              | 8         |
| F6_2 | Friends         | 1                    | 2 | 3 | 4 | 5 | 6 | 7              | 8         |
| F6_3 | Physician       | 1                    | 2 | 3 | 4 | 5 | 6 | 7              | 8         |
| F6_4 | Pharmacist      | 1                    | 2 | 3 | 4 | 5 | 6 | 7              | 8         |
| F6_5 | Insurance agent | 1                    | 2 | 3 | 4 | 5 | 6 | 7              | 8         |
| F6_6 | Internet        | 1                    | 2 | 3 | 4 | 5 | 6 | 7              | 8         |
| F6_7 | Books/journals  | 1                    | 2 | 3 | 4 | 5 | 6 | 7              | 8         |
| F6_8 | Other sources   | 1                    | 2 | 3 | 4 | 5 | 6 | 7              | 8         |

## REZENSIONEN / REVIEWS

6. Im Folgenden werden Weiterempfehlungsplattformen abgefragt. **Kennen Sie Plattformen im Internet, auf denen PatientInnen die Möglichkeit haben, ihren letzten Arztbesuch zu bewerten?** Ein Beispiel für eine solche Plattform wäre imedo.de.

1 Ja    2 Nein    3 Keine Antwort

Questions regarding rating websites will be asked below. **Do you know any websites, where patients have the opportunity to rate their physicians?**

1 Yes    2 No    3 No answer

7. **Haben Sie schon einmal Informationen über einen Arzt / eine Ärztin auf einer solchen Plattform eingeholt?**

1 Ja    2 Nein    3 Keine Antwort

**Have you ever gathered information on a physician from a PRW?**

1 Yes    2 No    3 No answer

8. Haben Sie schon einmal einen Arzt / eine Ärztin selbst bewertet?

1 Ja 2 Nein 3 Keine Antwort

Have you ever rated a physician on a PRW?

1 Yes 2 No 3 No answer

9. Wenn nein, inwiefern können Sie sich vorstellen einen Arzt/eine Ärztin auf einer Empfehlungsplattform im Internet zu bewerten?

Kann ich mir  
überhaupt nicht  
vorstellen

1

2

3

4

5

6

Kann ich mir  
sehr gut  
vorstellen

7

Keine  
Antwort

8

If „no“, can you imagine rating a physician on a PRW?

1 Yes 2 No 3 No answer

10. Wie wahrscheinlich ist es, dass Sie in Zukunft eine solche Empfehlungsplattform für Ärzte/Ärztinnen nutzen werden?

Überhaupt nicht  
wahrscheinlich

1

2

3

4

5

6

Sehr  
wahrscheinlich

7

Keine  
Antwort

8

How probable is it that you will use such a PRW in the future?

Not at all  
probable

1

2

3

4

5

6

Very  
probable

7

No  
answer

8

11. Wie nützlich finden Sie solche Empfehlungsplattformen für die Arztsuche im Vergleich zu anderen Empfehlungsquellen (z.B. andere Ärzte, Familie, Bekannte etc.)?

Überhaupt  
nicht  
nützlich

1

2

3

4

5

6

Sehr  
nützlich

7

Keine  
Antwort

8

How useful are PRWs in comparison to other recommendation sources (e.g. other physicians, family, friends etc.) from your point of view?

Not at all  
useful

1

2

3

4

5

6

Very useful

7

No  
answer

8

12. Inwieweit vertrauen Sie den Informationen auf Empfehlungsplattformen für Ärzte und Ärztinnen?

Ich habe  
überhaupt  
kein  
Vertrauen.

1

2

3

4

5

6

Ich habe  
sehr großes  
Vertrauen.

7

Keine  
Antwort

8

How much do you trust the information on PRWs?

No trust at  
all

1

2

3

4

5

6

Very high  
trust

7

No  
answer

8

## DEMOGRAPHISCHE ANGABEN / SOCIODEMOGRAPHIC DATA

### 13. Haben Sie eine chronische Erkrankung?

- 1 Ja      2 Nein      3 Keine Antwort

Do you have a chronic disease?

- 1 Yes      2 No      3 No answer

D1 Gender:      [1] male  
                         [2] female

D2\_1 Year of birth: \_\_\_\_\_

### Höchste abgeschlossene Ausbildung:

- 1 Schüler in allgemeinbildender Schule (ohne Schulabschluss)
- 2 Haupt-/Volksschulabschluss ohne Lehre
- 3 Haupt-/Volksschulabschluss mit Lehre
- 4 Weiterführende Schule ohne Abitur (Realschulabschluss / Mittlere Reife)
- 5 Abitur / (Fach-) Hochschulreife ohne Studium
- 6 Abitur / (Fach-) Hochschulreife mit Studium
- 7 Promotion/ Habilitation
- 8 Keine Antwort

### Highest education level:

- 1 Without school qualification
- 2 Secondary general school
- 3 Polytechnic secondary school
- 4 Intermediate secondary school
- 5 Matura examination
- 6 University degree
- 7 Postdoctoral degree / Professor
- 8 No answer
